# Supplementary material for: RNA structure prediction using positive and negative evolutionary information
Source: PubMed Central journal article supplement (PMC7657543; doi:10.1371/journal.pcbi.1008387), 2020-10-30

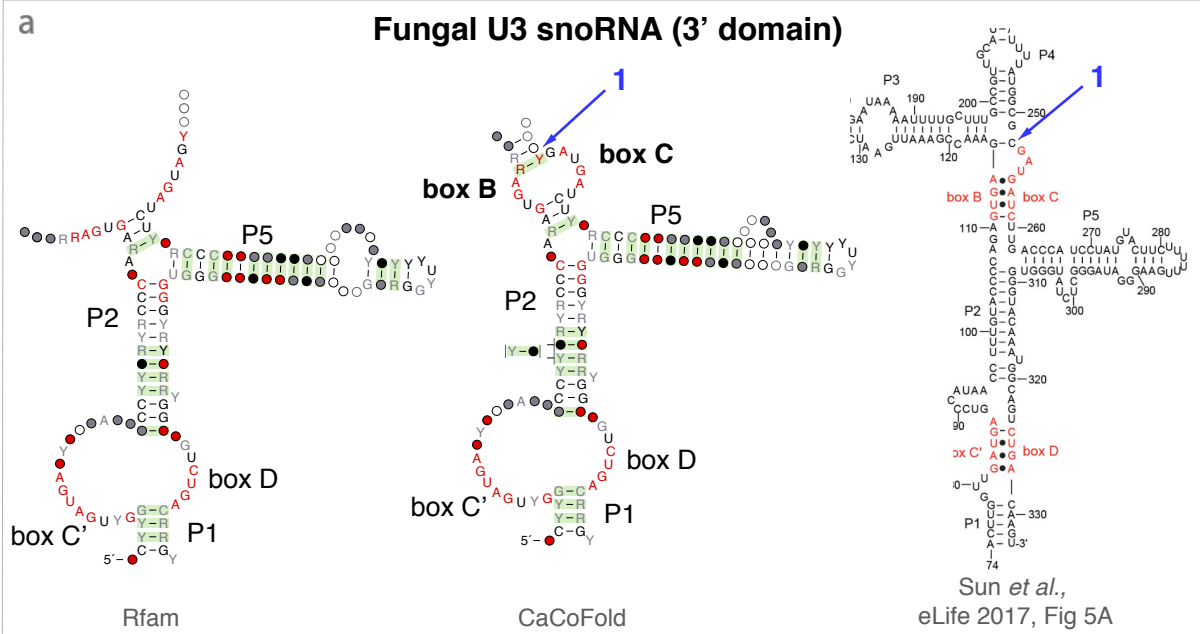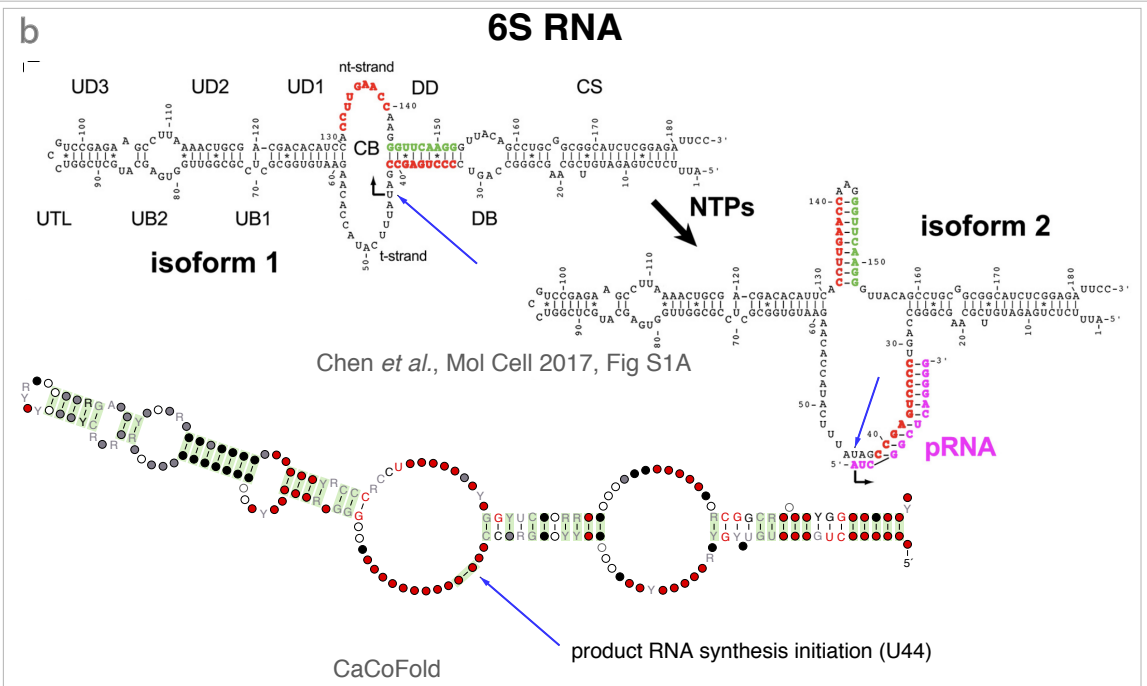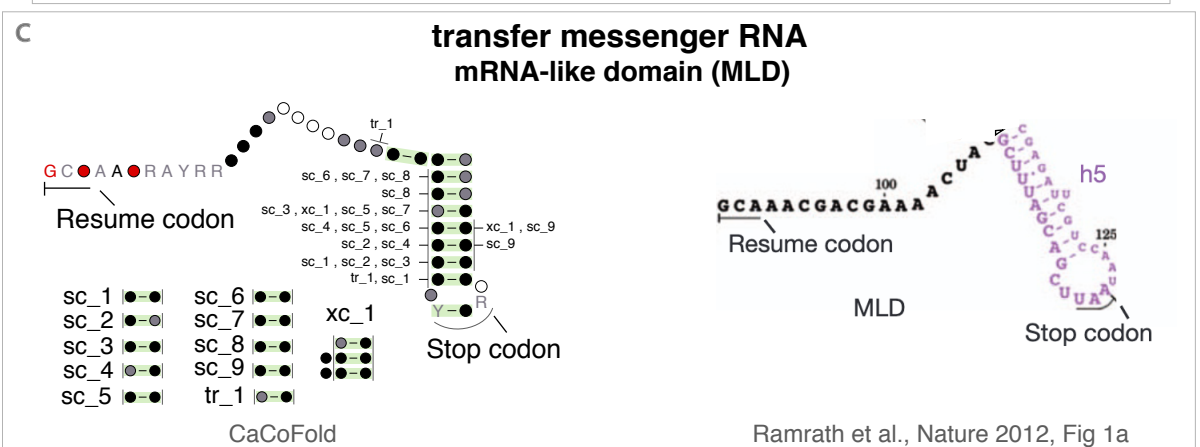

Supplement: pcbi.1008387.s006.pdf [file pcbi.1008387.s006.pdf]
