# Supplementary material for: RNA structure prediction using positive and negative evolutionary information
Source: PubMed Central journal article supplement (PMC7657543; doi:10.1371/journal.pcbi.1008387), 2020-10-30
Supplement: pcbi.1008387.s009.pdf [file pcbi.1008387.s009.pdf]

Table S1. **277 Rfam and 105 ZWD structural alignments for which CaCoFold proposes a structure including larger number of covarying basepairs.** List of alignments for which the CaCoFold structure incorporates more covarying pairs. The alignments have been classified as belonging to one of 15 types described in the main text depending on what kind of modifications the CaCoFold structure introduces. Each alignment has been classified into one type. Here we note alignments that could be placed into more than one category. Because many of the RNAs in ZWD have been incorporated into Rfam, there is an important overlap between the two databases. The 382 structural alignments (277 Rfam + 105 ZWD) with improved CaCoFold structure represent 314 different RNAs, as 68 of the 105 ZWD RNAs have been incorporated into Rfam v14.1. For the 68 RNAs with representation in both databases, the corresponding alignments and structures are sometimes different. These 68 RNAs with different Rfam and ZWD alignments have been grouped together when the structural changes introduced by CaCoFold correspond to the same type. They are only 5/68 RNAs (PhotoRC-II/RF01717, manA/RF01745, radC/RF01754, pemK/RF02913, Mu-gpT-DE/RF03012) for which the ZWD and Rfam v14.1 alignments resulted in different CaCoFold structural modifications. All alignments with the structural annotation are provided as part of the supplemental materials.

### Type 1: Helix expanded by additional covariations

| RNA                           | Rfam ID | Rfam alignment                   |                                |                            |              | ZWD alignment                    |                                |                           |              | other types |
|-------------------------------|---------|----------------------------------|--------------------------------|----------------------------|--------------|----------------------------------|--------------------------------|---------------------------|--------------|-------------|
|                               |         | extra covs in CaCoFold structure | CaCoFold structure cov_bps/bps | Rfam structure cov_bps/bps | covs obs/exp | extra covs in CaCoFold structure | CaCoFold structure cov_bps/bps | ZWD structure cov_bps/bps | covs obs/exp |             |
| PhotoRC-II                    | RF01717 | 7                                | 20/24                          | 13/13                      | 20/20.8      | 1                                | 17/21                          | 16/19                     | 17/15.4      |             |
| 6A                            | RF02925 | 1                                | 11/14                          | 10/10                      | 11/8.7       |                                  |                                |                           |              |             |
| TwoAYGGAY                     | RF01731 | 3                                | 45/56                          | 42/45                      | 45/46.6      |                                  |                                |                           |              |             |
| drum                          | RF02958 | 3                                | 29/38                          | 26/28                      | 29/33.7      | 2                                | 26/34                          | 24/28                     | 26/30.7      |             |
| group-II-D1D4-7               | RF02012 | 2                                | 40/42                          | 38/41                      | 40/41.4      | 2                                | 43/45                          | 41/44                     | 43/44.2      |             |
| T-box                         | RF00230 | 1                                | 41/51                          | 40/47                      | 41/28.4      |                                  |                                |                           |              |             |
| Bacteria small SRP            | RF00169 | 3                                | 31/31                          | 28/33                      | 31/30.9      |                                  |                                |                           |              |             |
| DUF2800                       | RF02960 | 1                                | 32/53                          | 31/40                      | 32/28.5      | 1                                | 31/53                          | 30/46                     | 31/30.3      |             |
| malK-I                        | RF03069 | 1                                | 40/52                          | 39/54                      | 40/40.7      |                                  |                                |                           |              |             |
| Flavobacterium-1              | RF02976 | 1                                | 24/36                          | 23/37                      | 24/16.3      | 1                                | 24/36                          | 23/37                     | 24/17.1      |             |
| ykoK                          | RF00380 | 2                                | 31/44                          | 29/47                      | 31/36.4      |                                  |                                |                           |              |             |
| DUF3800-III                   | RF02962 | 1                                | 19/34                          | 18/31                      | 19/9.6       | 1                                | 19/34                          | 18/31                     | 19/10.1      |             |
| ydaO-yuaA                     | RF00379 | 3                                | 18/37                          | 15/26                      | 18/22.3      |                                  |                                |                           |              |             |
| terC                          | RF03067 | 1                                | 9/16                           | 8/15                       | 9/7.8        | 1                                | 9/16                           | 8/15                      | 9/7.9        |             |
| RT-4                          | RF03025 | 1                                | 16/30                          | 15/29                      | 16/5.9       | 1                                | 16/30                          | 15/30                     | 16/6.6       |             |
| Betaproteobacteria toxic sRNA | RF02278 | 1                                | 8/17                           | 7/16                       | 8/5.0        |                                  |                                |                           |              |             |
| engA                          | RF02972 | 1                                | 8/25                           | 7/27                       | 8/5.2        | 1                                | 8/26                           | 7/27                      | 8/5.9        |             |
| DUF3800-XI                    | RF02975 | 1                                | 3/14                           | 2/10                       | 3/5.7        |                                  |                                |                           |              |             |
| mir-929                       | RF00947 | 1                                | 3/31                           | 2/26                       | 3/1.6        |                                  |                                |                           |              |             |
| group-II-D1D4-8               |         |                                  |                                |                            |              | 1                                | 33/37                          | 32/38                     | 33/35.7      |             |
| group-I-patch3                |         |                                  |                                |                            |              | 2                                | 30/35                          | 28/36                     | 30/29.3      | 9           |
| HEARO                         | RF02033 |                                  |                                |                            |              | 1                                | 60/85                          | 59/85                     | 60/52.7      |             |
| c-di-GMP-II-GAG               | RF01786 |                                  |                                |                            |              | 1                                | 19/28                          | 18/29                     | 19/21.4      |             |

### Type 2: One new helix with covariation support

| RNA               | Rfam ID | Rfam alignment                   |                                |                            |              | ZWD alignment                    |                                |                           |              | other types |
|-------------------|---------|----------------------------------|--------------------------------|----------------------------|--------------|----------------------------------|--------------------------------|---------------------------|--------------|-------------|
|                   |         | extra covs in CaCoFold structure | CaCoFold structure cov_bps/bps | Rfam structure cov_bps/bps | covs obs/exp | extra covs in CaCoFold structure | CaCoFold structure cov_bps/bps | ZWD structure cov_bps/bps | covs obs/exp |             |
| group-II-D1D4-4   | RF02003 | 2                                | 26/37                          | 24/27                      | 26/29.9      | 1                                | 25/29                          | 24/27                     | 25/10.8      |             |
| yypP-ykoY         | RF00080 | 1                                | 18/59                          | 17/25                      | 18/21.2      |                                  |                                |                           |              |             |
| sok               | RF01794 | 3                                | 17/51                          | 14/27                      | 17/31.1      |                                  |                                |                           |              |             |
| Mahella-1         | RF03007 | 1                                | 9/31                           | 8/22                       | 9/2.1        | 1                                | 9/31                           | 8/23                      | 9/2.2        | 8           |
| Streptomyces-metH | RF03076 | 1                                | 4/36                           | 3/13                       | 4/7.8        | 1                                | 4/36                           | 3/13                      | 4/7.9        |             |
| snoZ152           | RF00350 | 1                                | 2/18                           | 1/5                        | 2/0.6        |                                  |                                |                           |              |             |
| MIR1446           | RF00954 | 1                                | 4/36                           | 3/36                       | 4/0.3        |                                  |                                |                           |              |             |
| Afu 254           | RF01504 | 1                                | 2/11                           | 1/12                       | 2/0.4        |                                  |                                |                           |              |             |
| HgcC              | RF00062 | 3                                | 4/33                           | 1/27                       | 4/0.7        |                                  |                                |                           |              | 9           |
| beta tmRNA        | RF01850 | 1                                | 3/107                          | 2/55                       | 3/2.9        |                                  |                                |                           |              |             |
| ldcC              |         |                                  |                                |                            |              | 1                                | 9/15                           | 8/11                      | 9/10.0       |             |

### Type 3: One helix completely modified

| RNA          | Rfam ID | Rfam alignment                   |                                |                            |              | ZWD alignment                    |                                |                           |              | other types |
|--------------|---------|----------------------------------|--------------------------------|----------------------------|--------------|----------------------------------|--------------------------------|---------------------------|--------------|-------------|
|              |         | extra covs in CaCoFold structure | CaCoFold structure cov_bps/bps | Rfam structure cov_bps/bps | covs obs/exp | extra covs in CaCoFold structure | CaCoFold structure cov_bps/bps | ZWD structure cov_bps/bps | covs obs/exp |             |
| 5S rRNA      | RF00001 | 9                                | 16/22                          | 14/15                      | 16/8.7       |                                  |                                |                           |              |             |
| RT-3         | RF03068 | 8                                | 28/41                          | 20/33                      | 28/21.2      |                                  |                                |                           |              |             |
| manA         | RF01745 | 19                               | 48/65                          | 29/59                      | 48/48.8      | 1                                | 55/68                          | 54/63                     | 55/36.2      |             |
| IS605-orfB-I | RF03065 | 14                               | 40/66                          | 26/63                      | 40/39.0      |                                  |                                |                           |              |             |
| mir-17       | RF00051 | 1                                | 3/31                           | 2/25                       | 3/1.2        |                                  |                                |                           |              |             |
| sraA         | RF02029 | 1                                | 2/19                           | 1/20                       | 2/1.3        |                                  |                                |                           |              |             |
| P18          | RF01671 | 1                                | 2/38                           | 1/41                       | 2/0.1        |                                  |                                |                           |              |             |

### Type 4: New pseudoknot with covariation support

| RNA                  | Rfam ID | Rfam alignment                   |                                |                            |              | ZWD alignment                    |                                |                           |              | other types |
|----------------------|---------|----------------------------------|--------------------------------|----------------------------|--------------|----------------------------------|--------------------------------|---------------------------|--------------|-------------|
|                      |         | extra covs in CaCoFold structure | CaCoFold structure cov_bps/bps | Rfam structure cov_bps/bps | covs obs/exp | extra covs in CaCoFold structure | CaCoFold structure cov_bps/bps | ZWD structure cov_bps/bps | covs obs/exp |             |
| Coronavirus 3'UTR pk | RF00165 | 2                                | 16/22                          | 14/15                      | 16/8.7       |                                  |                                |                           |              |             |
| gut-2                | RF02990 | 1                                | 12/18                          | 11/12                      | 12/8.2       | 1                                | 12/18                          | 11/12                     | 12/8.4       | 9           |
| U2                   | RF00004 | 6                                | 45/54                          | 39/45                      | 45/43.5      |                                  |                                |                           |              |             |
| Fluoride             | RF01734 | 6                                | 14/17                          | 8/10                       | 14/13.6      |                                  |                                |                           |              | 5           |
| SAM                  | RF00162 | 8                                | 27/35                          | 19/27                      | 27/27.5      |                                  |                                |                           |              | 6           |
| radC                 | RF01754 | 2                                | 24/42                          | 22/35                      | 24/29.8      | 1                                | 26/56                          | 25/40                     | 26/26.2      |             |
| GOLLDD               | RF02032 | 13                               | 79/139                         | 66/106                     | 79/66.2      |                                  |                                |                           |              |             |
| FMN                  | RF00050 | 4                                | 17/40                          | 13/23                      | 17/23.1      |                                  |                                |                           |              | 10,1        |
| Archaea SRP          | RF01857 | 1                                | 69/111                         | 68/132                     | 69/63.5      |                                  |                                |                           |              |             |
| ZMP-ZTP              | RF01750 | 4                                | 15/25                          | 11/22                      | 15/16.3      |                                  |                                |                           |              |             |
| chrB-a               | RF03078 | 1                                | 5/19                           | 4/12                       | 5/6.0        |                                  |                                |                           |              | 2           |
| STAXI                | RF01728 | 5                                | 15/51                          | 10/33                      | 15/16.6      |                                  |                                |                           |              |             |
| snoZ30               | RF00288 | 1                                | 3/34                           | 2/7                        | 3/1.9        |                                  |                                |                           |              |             |
| ToxI                 | RF02519 | 1                                | 2/8                            | 1/4                        | 2/0.0        |                                  |                                |                           |              |             |
| snR49                | RF01239 | 5                                | 7/50                           | 2/47                       | 7/0.3        |                                  |                                |                           |              | 9           |
| sRNA162              | RF02792 | 1                                | 2/51                           | 1/50                       | 2/0.0        |                                  |                                |                           |              |             |

### Type 5: New junction or new internal loop or new coaxials

| RNA             | Rfam ID | Rfam alignment                         |                                      |                                  |                 | ZWD alignment                          |                                      |                                 |                 | other types |
|-----------------|---------|----------------------------------------|--------------------------------------|----------------------------------|-----------------|----------------------------------------|--------------------------------------|---------------------------------|-----------------|-------------|
|                 |         | extra covs<br>in CaCoFold<br>structure | CaCoFold<br>structure<br>cov_bps/bps | Rfam<br>structure<br>cov_bps/bps | covs<br>obs/exp | extra covs<br>in CaCoFold<br>structure | CaCoFold<br>structure<br>cov_bps/bps | ZWD<br>structure<br>cov_bps/bps | covs<br>obs/exp |             |
| pemK            | RF02913 | 10                                     | 25/25                                | 15/15                            | 25/24.3         | 4                                      | 18/18                                | 14/15                           | 18/17.5         |             |
| RAGATH-18       | RF03064 | 10                                     | 27/28                                | 17/18                            | 27/27.2         | 7                                      | 24/25                                | 17/18                           | 24/24.3         | 7           |
| cow-rumen-2     | RF02947 | 3                                      | 19/27                                | 16/17                            | 19/6.7          | 3                                      | 19/27                                | 16/17                           | 19/6.8          | 4           |
| Cobalamin       | RF00174 | 14                                     | 49/56                                | 35/42                            | 49/47.4         |                                        |                                      |                                 |                 | 1,9,7       |
| RNaseP bact a   | RF00010 | 7                                      | 101/115                              | 94/114                           | 101/104.8       |                                        |                                      |                                 |                 | 9,7         |
| U4              | RF00015 | 2                                      | 27/40                                | 25/31                            | 27/32.6         |                                        |                                      |                                 |                 |             |
| group-II-D1D4-5 | RF02004 | 3                                      | 46/58                                | 43/54                            | 46/51.3         | 3                                      | 43/59                                | 40/54                           | 43/37.8         |             |
| group-II-D1D4-3 | RF02001 | 3                                      | 39/41                                | 36/48                            | 39/39.7         | 2                                      | 38/41                                | 36/48                           | 38/37.8         |             |
| SpF59 sRNA      | RF02440 | 2                                      | 11/16                                | 9/12                             | 11/10.8         |                                        |                                      |                                 |                 | 2           |
| RNaseP bact b   | RF00011 | 2                                      | 76/104                               | 74/105                           | 76/71.8         |                                        |                                      |                                 |                 |             |
| OLE             | RF01071 | 2                                      | 51/187                               | 49/159                           | 51/39.6         |                                        |                                      |                                 |                 | 2           |
| RtT             | RF00391 | 2                                      | 8/33                                 | 6/24                             | 8/11.0          |                                        |                                      |                                 |                 | 1           |
| MIR169 2        | RF00645 | 4                                      | 9/37                                 | 5/22                             | 9/20.9          |                                        |                                      |                                 |                 | 9           |
| freshwater-1    | RF02979 | 1                                      | 4/14                                 | 3/15                             | 4/0.4           |                                        |                                      |                                 |                 |             |
| rsmX            | RF02144 | 1                                      | 3/32                                 | 2/36                             | 3/2.8           |                                        |                                      |                                 |                 |             |
| vWFA-era        |         |                                        |                                      |                                  |                 | 1                                      | 12/16                                | 11/16                           | 12/1.8          |             |
| c-di-GMP-I-UAC  | RF01051 |                                        |                                      |                                  |                 | 1                                      | 14/23                                | 13/22                           | 14/8.5          |             |

### Type 6: Internal loop or multiloop reshaped by coaxial stacking

| RNA             | Rfam ID | Rfam alignment                         |                                      |                                  |                 | ZWD alignment                          |                                      |                                 |                 | other types |
|-----------------|---------|----------------------------------------|--------------------------------------|----------------------------------|-----------------|----------------------------------------|--------------------------------------|---------------------------------|-----------------|-------------|
|                 |         | extra covs<br>in CaCoFold<br>structure | CaCoFold<br>structure<br>cov_bps/bps | Rfam<br>structure<br>cov_bps/bps | covs<br>obs/exp | extra covs<br>in CaCoFold<br>structure | CaCoFold<br>structure<br>cov_bps/bps | ZWD<br>structure<br>cov_bps/bps | covs<br>obs/exp |             |
| DUF3800-IX      | RF02968 | 4                                      | 22/27                                | 18/21                            | 22/21.2         | 4                                      | 23/28                                | 19/22                           | 23/23.0         |             |
| group-II-D1D4-6 | RF02005 | 5                                      | 51/61                                | 46/58                            | 51/54.2         | 3                                      | 49/68                                | 46/58                           | 49/38.3         |             |
| RT-2            | RF03077 | 3                                      | 38/56                                | 35/45                            | 38/43.2         | 3                                      | 41/58                                | 38/48                           | 41/46.3         |             |
| manA            | RF01745 | 19                                     | 48/65                                | 29/59                            | 48/48.8         | 1                                      | 55/68                                | 54/63                           | 55/36.2         |             |
| Fungi U3        | RF01846 | 3                                      | 39/101                               | 36/79                            | 39/63.9         |                                        |                                      |                                 |                 | 1,10        |
| potC            | RF01751 | 1                                      | 4/17                                 | 3/17                             | 4/6.8           | 1                                      | 4/18                                 | 3/17                            | 4/3.3           |             |
| TwoGGAY         |         |                                        |                                      |                                  |                 | 3                                      | 46/55                                | 43/46                           | 46/42.2         | 9           |
| RAGATH-2-HDV    |         |                                        |                                      |                                  |                 | 3                                      | 26/28                                | 23/26                           | 26/27.0         |             |
| hatchet         |         |                                        |                                      |                                  |                 | 5                                      | 34/61                                | 29/37                           | 34/40.0         |             |
| group-I-patch5  |         |                                        |                                      |                                  |                 | 1                                      | 19/23                                | 18/23                           | 19/19.3         |             |
| group-II-D1D4-9 |         |                                        |                                      |                                  |                 | 2                                      | 76/140                               | 74/122                          | 76/73.0         | 7           |
| IS605-orfB      |         |                                        |                                      |                                  |                 | 2                                      | 42/65                                | 40/69                           | 42/40.2         | 1           |

### Type 7: Hairpin or internal loop covariations (often non Watson-Crick)

| RNA             | Rfam ID | Rfam alignment                         |                                      |                                  |                 | ZWD alignment                          |                                      |                                 |                 | other types |
|-----------------|---------|----------------------------------------|--------------------------------------|----------------------------------|-----------------|----------------------------------------|--------------------------------------|---------------------------------|-----------------|-------------|
|                 |         | extra covs<br>in CaCoFold<br>structure | CaCoFold<br>structure<br>cov_bps/bps | Rfam<br>structure<br>cov_bps/bps | covs<br>obs/exp | extra covs<br>in CaCoFold<br>structure | CaCoFold<br>structure<br>cov_bps/bps | ZWD<br>structure<br>cov_bps/bps | covs<br>obs/exp |             |
| int-alpA        | RF02996 | 7                                      | 30/32                                | 23/23                            | 30/26.3         | 11                                     | 34/35                                | 23/23                           | 34/30.7         |             |
| RAGATH-16       | RF03047 | 1                                      | 14/18                                | 13/16                            | 14/2.3          | 1                                      | 13/17                                | 12/16                           | 13/2.3          |             |
| DUF3800-VIII    | RF03075 | 1                                      | 19/25                                | 18/25                            | 19/18.0         | 1                                      | 20/29                                | 19/25                           | 20/22.5         |             |
| alpha tmRNA     | RF01849 | 1                                      | 33/75                                | 32/56                            | 33/49.8         |                                        |                                      |                                 |                 |             |
| DUF3577         | RF02954 | 1                                      | 14/32                                | 13/23                            | 14/10.4         |                                        |                                      |                                 |                 |             |
| Mu-gpT-DE       | RF03012 | 2                                      | 7/12                                 | 5/9                              | 7/6.5           | 2                                      | 12/13                                | 10/11                           | 12/10.7         | 8           |
| RT-12           | RF03016 | 1                                      | 18/46                                | 17/40                            | 18/10.2         | 1                                      | 18/46                                | 17/43                           | 18/10.1         |             |
| Actino-pnp      | RF01688 | 2                                      | 11/27                                | 9/22                             | 11/13.3         | 1                                      | 16/23                                | 15/26                           | 16/10.4         |             |
| IMES-2          | RF02035 | 1                                      | 16/32                                | 15/39                            | 16/20.2         | 1                                      | 18/46                                | 17/44                           | 18/16.8         |             |
| poplar-1        | RF03041 | 1                                      | 13/37                                | 12/32                            | 13/3.9          | 1                                      | 13/37                                | 12/32                           | 13/3.9          |             |
| traJ-II         | RF01760 | 1                                      | 13/34                                | 12/33                            | 13/13.4         | 1                                      | 12/33                                | 11/33                           | 12/6.9          |             |
| DUF3085         | RF02959 | 1                                      | 6/20                                 | 5/18                             | 6/1.2           |                                        |                                      |                                 |                 |             |
| RAGATH-13       | RF02688 | 1                                      | 2/25                                 | 1/23                             | 2/0.7           | 1                                      | 1/25                                 | 0/23                            | 1/0.7           |             |
| McaS            | RF00115 | 1                                      | 2/26                                 | 1/24                             | 2/0.1           |                                        |                                      |                                 |                 |             |
| CopA            | RF00042 | 6                                      | 7/34                                 | 1/25                             | 7/6.3           |                                        |                                      |                                 |                 |             |
| mir-3           | RF00716 | 1                                      | 2/23                                 | 1/26                             | 2/1.0           |                                        |                                      |                                 |                 |             |
| mir-344         | RF00825 | 1                                      | 2/26                                 | 1/32                             | 2/4.8           |                                        |                                      |                                 |                 |             |
| group-II-D5D6-1 |         |                                        |                                      |                                  |                 | 1                                      | 19/34                                | 18/29                           | 19/17.7         |             |
| RAGATH-34       | RF03103 |                                        |                                      |                                  |                 | 1                                      | 8/25                                 | 7/27                            | 8/2.2           |             |

### Type 8: Non Watson-Crick (not within a loop) covariations

| RNA               | Rfam ID | Rfam alignment                         |                                      |                                  |                 | ZWD alignment                          |                                      |                                 |                 | other types |
|-------------------|---------|----------------------------------------|--------------------------------------|----------------------------------|-----------------|----------------------------------------|--------------------------------------|---------------------------------|-----------------|-------------|
|                   |         | extra covs<br>in CaCoFold<br>structure | CaCoFold<br>structure<br>cov_bps/bps | Rfam<br>structure<br>cov_bps/bps | covs<br>obs/exp | extra covs<br>in CaCoFold<br>structure | CaCoFold<br>structure<br>cov_bps/bps | ZWD<br>structure<br>cov_bps/bps | covs<br>obs/exp |             |
| tRNA              | RF00005 | 16                                     | 37/37                                | 21/21                            | 37/37.0         |                                        |                                      |                                 |                 |             |
| Rhodo-rpoB        | RF03074 | 1                                      | 22/26                                | 21/23                            | 22/21.3         |                                        |                                      |                                 |                 |             |
| 6S                | RF00013 | 1                                      | 40/49                                | 39/49                            | 40/41.2         | 1                                      | 22/26                                | 21/23                           | 22/21.7         |             |
| glnA              | RF01739 | 1                                      | 11/15                                | 10/14                            | 11/11.0         |                                        |                                      |                                 |                 |             |
| THF               | RF01831 | 2                                      | 26/33                                | 24/36                            | 26/25.2         |                                        |                                      |                                 |                 |             |
| Mu-gpT-DE         | RF03012 | 2                                      | 7/12                                 | 5/9                              | 7/6.5           | 2                                      | 12/13                                | 10/11                           | 12/10.7         | 8           |
| RAGATH-27         | RF03100 | 1                                      | 9/23                                 | 8/15                             | 9/1.9           | 1                                      | 9/22                                 | 8/15                            | 9/1.8           |             |
| Corona FSE        | RF00507 | 1                                      | 5/24                                 | 4/19                             | 5/1.0           |                                        |                                      |                                 |                 |             |
| psaA              | RF01752 | 1                                      | 10/60                                | 9/62                             | 10/12.9         | 1                                      | 10/60                                | 9/63                            | 10/6.6          |             |
| Atu C6            | RF02500 | 1                                      | 4/35                                 | 3/25                             | 4/6.8           |                                        |                                      |                                 |                 |             |
| snR8              | RF01248 | 1                                      | 5/40                                 | 4/34                             | 5/1.7           |                                        |                                      |                                 |                 |             |
| Atu C8            | RF02502 | 1                                      | 4/32                                 | 3/32                             | 4/4.2           |                                        |                                      |                                 |                 |             |
| Y RNA             | RF00019 | 1                                      | 3/23                                 | 2/23                             | 3/7.1           |                                        |                                      |                                 |                 |             |
| SAM-II long loops | RF01726 | 1                                      | 2/5                                  | 1/12                             | 2/1.5           |                                        |                                      |                                 |                 |             |
| Rhino CRE         | RF00220 | 1                                      | 2/24                                 | 1/21                             | 2/0.5           |                                        |                                      |                                 |                 |             |
| snoR80            | RF01224 | 1                                      | 2/28                                 | 1/24                             | 2/0.8           |                                        |                                      |                                 |                 |             |
| MIR405            | RF00768 | 1                                      | 2/42                                 | 1/30                             | 2/0.7           |                                        |                                      |                                 |                 |             |
| IMPDH             | RF02994 | 1                                      | 2/31                                 | 1/31                             | 2/3.2           | 1                                      | 2/31                                 | 1/31                            | 2/3.5           |             |
| freshwater-2      | RF02980 |                                        |                                      |                                  |                 | 2                                      | 14/19                                | 12/17                           | 14/12.7         |             |
| Bacteroides-2     |         |                                        |                                      |                                  |                 | 4                                      | 15/23                                | 11/19                           | 15/6.0          |             |
| HTH-XRE           | RF02923 |                                        |                                      |                                  |                 | 1                                      | 6/19                                 | 5/13                            | 6/1.9           |             |
| RAGATH-24         | RF03049 |                                        |                                      |                                  |                 | 1                                      | 10/42                                | 9/40                            | 10/3.6          |             |
| Ocean-VI          | RF01714 |                                        |                                      |                                  |                 | 3                                      | 5/33                                 | 2/23                            | 5/6.2           |             |
| Chloroflexus-1    | RF02936 |                                        |                                      |                                  |                 | 2                                      | 3/59                                 | 1/43                            | 3/0.0           |             |

### Type 9: Triplets

| RNA | Rfam ID | Rfam alignment            |                       |                   |      | ZWD alignment             |                       |                  |      | other |
|-----|---------|---------------------------|-----------------------|-------------------|------|---------------------------|-----------------------|------------------|------|-------|
|     |         | extra covs<br>in CaCoFold | CaCoFold<br>structure | Rfam<br>structure | covs | extra covs<br>in CaCoFold | CaCoFold<br>structure | ZWD<br>structure | covs |       |



| RNA        | Rfam ID | Rfam alignment        |                       |                            |              | ZWD alignment         |                                |                           |              | other types |
|------------|---------|-----------------------|-----------------------|----------------------------|--------------|-----------------------|--------------------------------|---------------------------|--------------|-------------|
|            |         | in CaCoFold structure | structure cov_bps/bps | Rfam structure cov_bps/bps | covs obs/exp | in CaCoFold structure | CaCoFold structure cov_bps/bps | ZWD structure cov_bps/bps | covs obs/exp |             |
| PhotoRC-II | RF01717 | 7                     | 20/24                 | 13/13                      | 20/20.8      | 1                     | 17/21                          | 16/19                     | 17/15.4      |             |
| pemK       | RF02913 | 10                    | 25/25                 | 15/15                      | 25/24.3      | 4                     | 18/18                          | 14/15                     | 18/17.5      |             |

**Type 15: Low power; from zero or one covariation to one or two; inconclusive**

| RNA            | Rfam ID | Rfam alignment                   |                                |                            |              | ZWD alignment                    |                                |                           |              | other types |
|----------------|---------|----------------------------------|--------------------------------|----------------------------|--------------|----------------------------------|--------------------------------|---------------------------|--------------|-------------|
|                |         | extra covs in CaCoFold structure | CaCoFold structure cov_bps/bps | Rfam structure cov_bps/bps | covs obs/exp | extra covs in CaCoFold structure | CaCoFold structure cov_bps/bps | ZWD structure cov_bps/bps | covs obs/exp |             |
| HgcG           | RF00064 | 1                                | 3/79                           | 2/57                       | 3/0.2        |                                  |                                |                           |              |             |
| mir-190        | RF00672 | 1                                | 2/30                           | 1/31                       | 2/6.0        |                                  |                                |                           |              |             |
| snopsi28S-3327 | RF00544 | 1                                | 2/34                           | 1/35                       | 2/1.8        |                                  |                                |                           |              |             |
| mir-90         | RF00785 | 1                                | 2/8                            | 1/36                       | 2/0.1        |                                  |                                |                           |              |             |
| IRES HIF1      | RF00449 | 1                                | 2/79                           | 1/37                       | 2/5.2        |                                  |                                |                           |              |             |
| SNORA7         | RF00409 | 1                                | 2/38                           | 1/37                       | 2/2.6        |                                  |                                |                           |              |             |
| ceN101         | RF01664 | 1                                | 2/27                           | 1/39                       | 2/0.3        |                                  |                                |                           |              |             |
| SNORA3         | RF00334 | 1                                | 2/33                           | 1/40                       | 2/0.3        |                                  |                                |                           |              |             |
| STnc550        | RF02081 | 1                                | 2/77                           | 1/53                       | 2/1.4        |                                  |                                |                           |              |             |
| MNV 3UTR       | RF02532 | 1                                | 2/76                           | 1/74                       | 2/0.2        |                                  |                                |                           |              |             |
| Rev13          | RF02737 | 1                                | 2/93                           | 1/112                      | 2/0.0        |                                  |                                |                           |              |             |
| rli41          | RF01473 | 1                                | 2/95                           | 1/128                      | 2/0.2        |                                  |                                |                           |              |             |
| IsrR           | RF01419 | 3                                | 3/5                            | 0/11                       | 3/4.9        |                                  |                                |                           |              |             |
| K chan RES     | RF00485 | 3                                | 3/26                           | 0/24                       | 3/13.4       |                                  |                                |                           |              |             |
| GABA3          | RF01803 | 1                                | 1/17                           | 0/21                       | 1/1.7        |                                  |                                |                           |              |             |
| SpR19 sRNA     | RF02447 | 1                                | 1/18                           | 0/30                       | 1/2.5        |                                  |                                |                           |              |             |
| mir-393        | RF02516 | 1                                | 1/34                           | 0/29                       | 1/5.1        |                                  |                                |                           |              |             |
| snoZ188        | RF00311 | 1                                | 1/33                           | 0/6                        | 1/3.7        |                                  |                                |                           |              |             |
| rnk pseudo     | RF01772 | 2                                | 2/32                           | 0/23                       | 2/4.2        |                                  |                                |                           |              |             |
| fstAT          | RF01797 | 1                                | 1/14                           | 0/18                       | 1/1.4        |                                  |                                |                           |              |             |
| U54            | RF00206 | 1                                | 1/14                           | 0/5                        | 1/1.7        |                                  |                                |                           |              |             |
| snoR64         | RF00267 | 1                                | 1/21                           | 0/11                       | 1/0.6        |                                  |                                |                           |              |             |
| Spd-sr37       | RF02419 | 1                                | 1/19                           | 0/12                       | 1/1.8        |                                  |                                |                           |              |             |
| STnc130        | RF02084 | 1                                | 1/23                           | 0/10                       | 1/1.4        |                                  |                                |                           |              |             |
| SNORA42        | RF00406 | 1                                | 1/38                           | 0/35                       | 1/1.5        |                                  |                                |                           |              |             |
| Entero CRE     | RF00048 | 1                                | 1/20                           | 0/12                       | 1/3.5        |                                  |                                |                           |              |             |
| SSRC34         | RF02526 | 1                                | 1/36                           | 0/36                       | 1/2.4        |                                  |                                |                           |              |             |
| IRES Hsp70     | RF00495 | 1                                | 1/64                           | 0/54                       | 1/2.9        |                                  |                                |                           |              |             |
| mir-132        | RF00662 | 1                                | 1/34                           | 0/16                       | 1/5.5        |                                  |                                |                           |              |             |
| mir-143        | RF00683 | 1                                | 1/31                           | 0/28                       | 1/2.3        |                                  |                                |                           |              |             |
| SNORA69        | RF00265 | 1                                | 1/26                           | 0/38                       | 1/0.8        |                                  |                                |                           |              |             |
| SNORD125       | RF01200 | 1                                | 1/21                           | 0/9                        | 1/0.7        |                                  |                                |                           |              |             |
| porB           | RF03042 | 1                                | 1/3                            | 0/7                        | 1/0.1        | 1                                | 1/3                            | 0/7                       | 1/0.1        |             |
| STnc630        | RF02052 | 1                                | 1/10                           | 0/31                       | 1/0.3        |                                  |                                |                           |              |             |
| TB6Cs1H1       | RF01546 | 1                                | 1/14                           | 0/16                       | 1/0.1        |                                  |                                |                           |              |             |
| PsrR1          | RF02701 | 1                                | 1/15                           | 0/8                        | 1/1.0        |                                  |                                |                           |              |             |
| RF site5       | RF01093 | 1                                | 1/11                           | 0/16                       | 1/0.2        |                                  |                                |                           |              |             |
| RsmY           | RF00195 | 1                                | 1/27                           | 0/19                       | 1/1.0        |                                  |                                |                           |              |             |
| snoR111        | RF01228 | 1                                | 1/21                           | 0/31                       | 1/0.3        |                                  |                                |                           |              |             |
| NRON           | RF00636 | 1                                | 1/24                           | 0/64                       | 1/0.8        |                                  |                                |                           |              |             |
| mir-338        | RF00686 | 1                                | 1/23                           | 0/21                       | 1/1.6        |                                  |                                |                           |              |             |
| snoTBR2        | RF02786 | 1                                | 1/16                           | 0/33                       | 1/0.2        |                                  |                                |                           |              |             |
| SNORD97        | RF01291 | 1                                | 1/31                           | 0/13                       | 1/0.7        |                                  |                                |                           |              |             |
| mir-365        | RF00659 | 1                                | 1/28                           | 0/29                       | 1/0.5        |                                  |                                |                           |              |             |
| Bp1 684        | RF02421 | 1                                | 1/23                           | 0/16                       | 1/0.4        |                                  |                                |                           |              |             |
| Rota CRE       | RF00501 | 1                                | 1/6                            | 0/17                       | 1/0.3        |                                  |                                |                           |              |             |
| snoR9          | RF00065 | 1                                | 1/36                           | 0/18                       | 1/0.3        |                                  |                                |                           |              |             |
| rpsL pseudo    | RF01773 | 1                                | 1/34                           | 0/35                       | 1/0.2        |                                  |                                |                           |              |             |
| IRES c-sis     | RF00549 | 1                                | 1/195                          | 0/201                      | 1/1.1        |                                  |                                |                           |              |             |
| mir-129        | RF00486 | 1                                | 1/36                           | 0/25                       | 1/0.5        |                                  |                                |                           |              |             |
| sX6            | RF02225 | 2                                | 2/87                           | 0/68                       | 2/2.0        |                                  |                                |                           |              |             |
| ceN100         | RF01607 | 3                                | 3/22                           | 0/35                       | 3/0.1        |                                  |                                |                           |              |             |
| mir-541        | RF00777 | 1                                | 1/25                           | 0/30                       | 1/0.7        |                                  |                                |                           |              |             |
| mir-246        | RF00819 | 1                                | 1/23                           | 0/33                       | 1/0.0        |                                  |                                |                           |              |             |
| SNORA67        | RF00272 | 1                                | 1/35                           | 0/33                       | 1/0.2        |                                  |                                |                           |              |             |
| scr4677        | RF02673 | 1                                | 1/66                           | 0/36                       | 1/2.3        |                                  |                                |                           |              |             |
| istR           | RF01400 | 1                                | 1/33                           | 0/44                       | 1/0.2        |                                  |                                |                           |              |             |
| snR4           | RF01244 | 1                                | 1/38                           | 0/54                       | 1/0.1        |                                  |                                |                           |              |             |
| MIR811         | RF00882 | 1                                | 1/84                           | 0/81                       | 1/0.5        |                                  |                                |                           |              |             |
