# Supplementary material for: RNA structure prediction using positive and negative evolutionary information
Source: PLoS Comput Biol. 2020 Oct 30;16(10):e1008387. doi: 10.1371/journal.pcbi.1008387 (PMC7657543; doi:10.1371/journal.pcbi.1008387)
Supplement: S5 Fig — Structural elements with covariation support introduced by CaCoFold relative to the Rfam annotation and corroborated by 3D structures are annotated in blue. (a) An additional covarying pair introduces a new internal loop in the B-type RNase P RNA confirmed by Ref. 63, Fig 4a. (b) An additional covarying pair introduces a new three-way junction in the Group-II intron D1D4-3 fragment [64]. (c) In the U5 snRNA, an additional Y-Y covarying pair that modifies a hairpin loop is confirmed by the S. pombe spliceosomal RNA cryo-EM structure 3JB9 (3.60 Å) [65]. (PDF) [file pcbi.1008387.s005.pdf]

## a Bacterial RNase P B-type

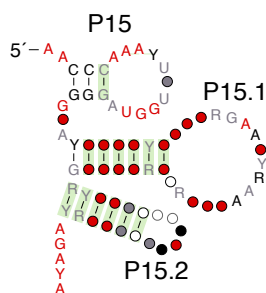

Rfam

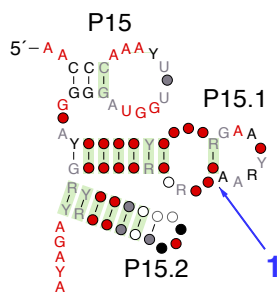

CaCoFold

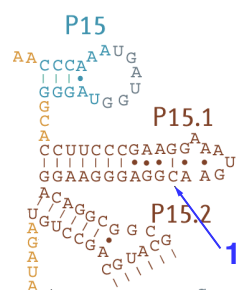

Kazantsev & Pace,  
Nat Rev 2006, Fig 3b

## b Group II intron

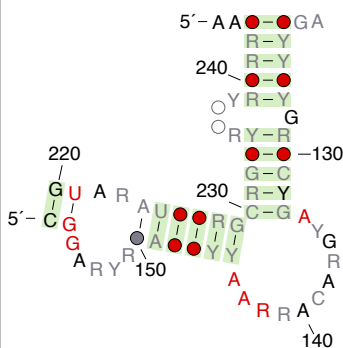

Rfam

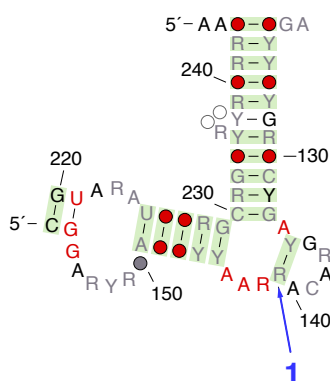

CaCoFold

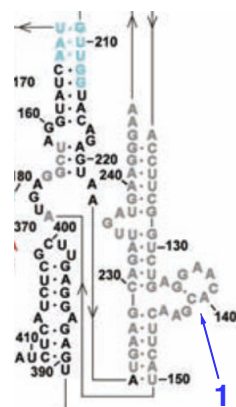

Toor et al.,  
Science 2008, Fig 1B

## c U5 spliceosomal snRNA

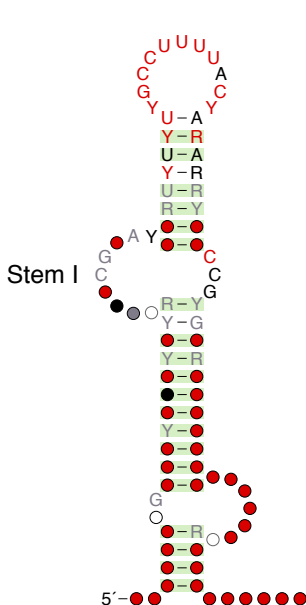

Rfam

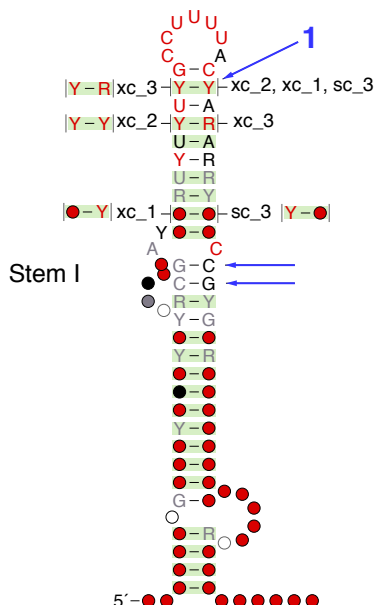

CaCoFold

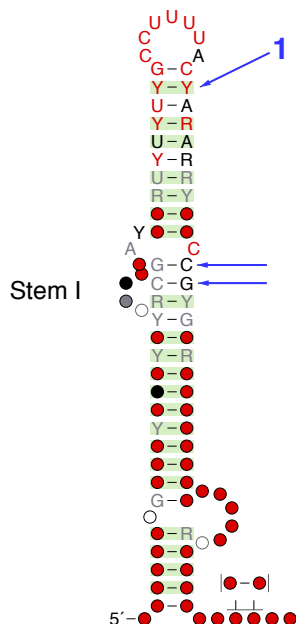

3JB9

Yan et al., Science 2015
